# Supplementary material for: Interpretation of zircon corona textures from metapelitic granulites of Ivrea-Verbano Zone, Northern Italy: Two-stage decomposition of Fe-Ti oxides
Source: Copernicus journal article supplement (doi:10.5194/se-2016-164), 2016-12-19
Supplement: Supplementary file 1 [file se-2016-164-supplement.pdf]

|                  |     |     |     |     |     |     |     |     |
|------------------|-----|-----|-----|-----|-----|-----|-----|-----|
| 97 / 1 .Grt core | 344 | 223 | 237 | 197 | 266 | 316 | 778 | 254 |
| 98 / 1 .Grt core | 380 | 224 | 237 | 211 | 256 | 315 | 780 | 253 |

Supplemental Table S1. Detection limiys of EMPA analyses in ppm.

| Comment            | X     | Y     | Z    |
|--------------------|-------|-------|------|
| IV12-05_pos01_1    | 12338 | 31291 | -11  |
| IV12-05_pos01_2    | 12139 | 31101 | -11  |
| IV12-05_pos01_3    | 12265 | 31074 | -11  |
| IV12-05_pos01_4    | 12459 | 31134 | -13  |
| IV12-05_pos01_6    | 12610 | 31094 | -15  |
| IV12-05_pos01_7    | 12558 | 31116 | -15  |
| IV12-05_pos01_8    | 12538 | 31188 | -15  |
| IV12-05_pos01_9    | 12767 | 31243 | -19  |
| IV12-05_pos01_10   | 12233 | 30928 | -17  |
| IV12-05_pos01_11   | 12234 | 30961 | -17  |
| IV12-05_pos01_12   | 12438 | 30987 | -17  |
| IV12-05_pos01_13   | 12543 | 30983 | -17  |
| IV12-05_pos01_14   | 12279 | 30999 | -17  |
| IV12-05_pos01_15   | 12348 | 30856 | -17  |
| IV12-05_pos01_16   | 12373 | 30891 | -17  |
| IV12-05_pos01_17   | 12184 | 30842 | -17  |
| IV12-05_pos01_18   | 17831 | 22603 | -78  |
| IV12-05_pos01_19   | 18042 | 22604 | -78  |
| IV12-05_pos01_20   | 17932 | 22531 | -78  |
| IV12-05_pos01_21   | 17947 | 22582 | -78  |
| IV12-05_pos01_22   | 18004 | 22759 | -78  |
| IV12-05_pos02_23   | 17724 | 22788 | -73  |
| IV12-05_pos02_24   | 17782 | 22708 | -73  |
| IV12-05_pos02_25   | 17861 | 22743 | -73  |
| IV12-05_pos02_26   | 17879 | 22703 | -73  |
| IV12-05_pos02_27   | 17865 | 22589 | -77  |
| IV12-05_pos02_28   | 18133 | 22696 | -82  |
| IV12-05_pos02_29   | 18227 | 22651 | -85  |
| IV12-05_pos02_30   | 17792 | 22633 | -82  |
| IV12-05_pos02_31   | 17829 | 22589 | -82  |
| IV12-05_pos02_32   | 17936 | 22758 | -82  |
| IV12-05_pos02_33   | 17947 | 22744 | -82  |
| IV12-05_pos02_34   | 17835 | 22554 | -82  |
| IV12-05_pos02_35   | 17835 | 22554 | -82  |
| IV12-05_pos02_36   | 17729 | 22638 | -82  |
| IV12-05_pos03_37   | 16696 | 16242 | -102 |
| IV12-05_pos03_38   | 16993 | 16635 | -102 |
| IV12-05_pos03_39   | 16934 | 16603 | -99  |
| IV12-05_pos03_40   | 16937 | 16448 | -99  |
| IV12-05_pos03_41   | 16945 | 16232 | -103 |
| IV12-05_pos03_42   | 16981 | 16233 | -103 |
| IV12-05_pos03_43   | 16912 | 16276 | -103 |
| IV12-05_pos03_44   | 16970 | 16277 | -103 |
| IV12-05_pos03_45   | 16731 | 16234 | -103 |
| IV12-05_pos03_46   | 17005 | 16257 | -103 |
| IV12-05_pos03_47   | 16581 | 16500 | -103 |
| IV12-05_grt1_c     | 16811 | 15481 | -100 |
| IV12-05_grt1_r     | 16648 | 15610 | -100 |
| IV12-05_pos04_48   | 2393  | 23044 | 12   |
| IV12-05_pos04_49   | 2487  | 23203 | 12   |
| IV12-05_pos04_50   | 2264  | 23191 | 12   |
| IV12-05_pos04_51   | 2187  | 22927 | 12   |
| IV12-05_pos04_52   | 2395  | 23026 | 12   |
| IV12-05_pos04_53   | 2489  | 23188 | 12   |
| IV12-05_pos04_54_c | 2684  | 23008 | 12   |

|                    |      |       |    |
|--------------------|------|-------|----|
| IV12-05_pos04_55_c | 2658 | 22820 | 12 |
| IV12-05_pos04_56_c | 2878 | 22833 | 12 |
